# Supplementary material
Source: Springer Nature journal article supplement (https://www.springermedizin.de/resource/supplementary/12967_2011_1054_MOESM4_ESM.pdf/9573628)

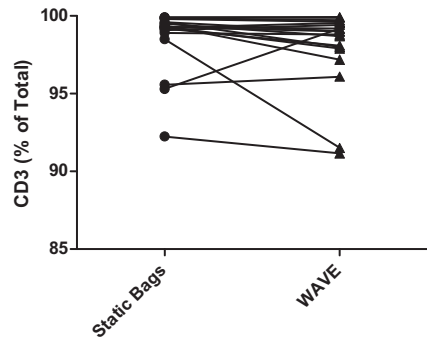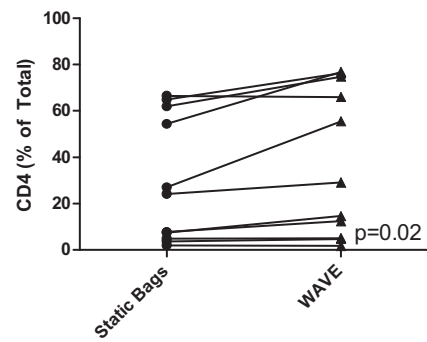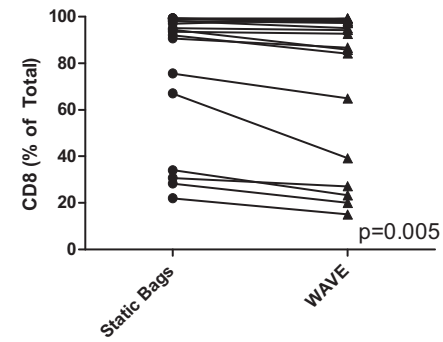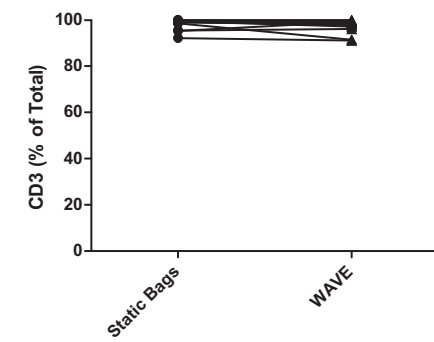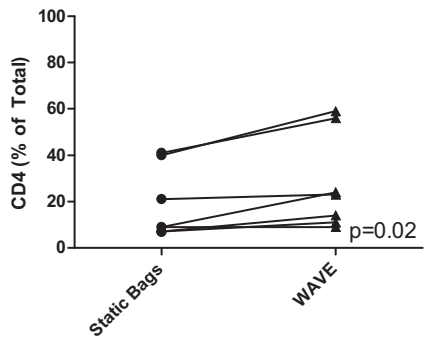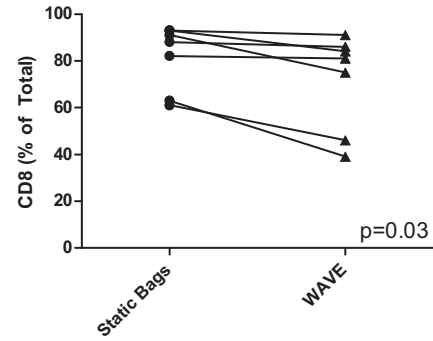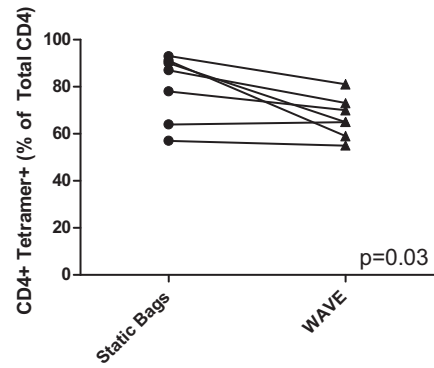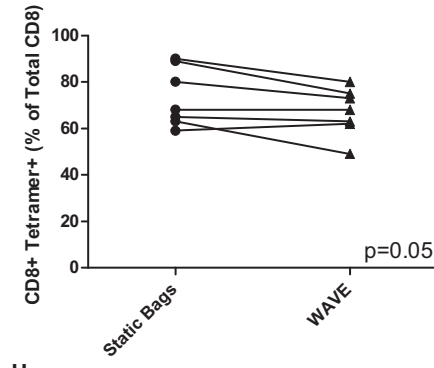

Supplement: MOESM4 [file 9573628]
